# Supplementary material for: Use of Machine-Learning Algorithms in Intensified Preoperative Therapy of Pancreatic Cancer to Predict Individual Risk of Relapse
Source: MDPI journal article supplement (doi:10.3390/cancers11050606), 2019-04-30

## Supplementary Materials: Use of Machine-Learning Algorithms in Intensified Preoperative Therapy of Pancreatic Cancer to Predict Individual Risk of Relapse

Pablo Sala Elarre, Esther Oyaga-Iriarte, Kenneth Yu, Vicky Baudin, Leire Arbea Moreno, Omar Carranza, Ana Chopitea Ortega, Mariano Ponz-Sarvise, Luis D Mejías Sosa, Fernando Rotellar Sastre, Blanca Larrea Leoz, Yohana Iragorri Barberena, Jose C Subtil Iñigo, Alberto Benito Boillos, Fernando Pardo and Javier Rodríguez Rodríguez

**Table S1.** Resectability criteria by National Comprehensive Cancer Network.

| Resectability Group   | Arterial                                                                                                                                                                                                                                        | Venous                                                                                                                                                                       |
|-----------------------|-------------------------------------------------------------------------------------------------------------------------------------------------------------------------------------------------------------------------------------------------|------------------------------------------------------------------------------------------------------------------------------------------------------------------------------|
| Resectable            | No tumor contact with celiac axis (CA), superior mesenteric artery (SMA) or common hepatic artery (CHA).                                                                                                                                        | No tumor contact with superior mesenteric vein (SMV) or portal vein (PV).                                                                                                    |
|                       |                                                                                                                                                                                                                                                 | Tumor contact with SMV or PV $\leq 180^\circ$ without vein contour irregularity                                                                                              |
| Borderline-Resectable | Pancreatic head/uncinate process:<br>Tumor contact with CHA without extension to CA or hepatic artery bifurcation.<br>Tumor contact with SMA $\leq 180^\circ$<br>Tumor contact with variant arterial anatomy that may affect surgical planning. | Tumor contact with SMV or PV $< 180^\circ$ with vein contour irregularity or thrombosis of the vein but with suitable vessel proximal and distal to the site of involvement. |
|                       | Pancreatic body/tail:<br>Tumor contact with CA $\leq 180^\circ$<br>Tumor contact with CA $>180^\circ$ without involvement of the aorta and gastroduodenal artery (permitting a modified Appleby procedure).                                     | Tumor contact with SMV or PV $> 180^\circ$                                                                                                                                   |
|                       |                                                                                                                                                                                                                                                 | Tumor contact with inferior vena cava (IVC).                                                                                                                                 |
|                       |                                                                                                                                                                                                                                                 |                                                                                                                                                                              |

**Table S2.** Tumor regression grade according to the College of American Pathologists (CAP) grading system.

| CAP Grade | Definition                                                                                  |
|-----------|---------------------------------------------------------------------------------------------|
| 0         | No viable residual tumor (pathologic complete response (pCR))                               |
| 1         | Minimal residual cancer with single cells or small groups of cancer cells (marked response) |
| 2         | Residual cancer outgrown by fibrosis (moderate response)                                    |
| 3         | Extensive residual cancer (poor or no response)                                             |

**Table S3.** Grade of nodal treatment response scale adapted from the Miller & Payne grading system.

| Miller & Payne Grade | Definition                                                                               |
|----------------------|------------------------------------------------------------------------------------------|
| A                    | True negative lymph nodes, with no evidence of pathological effects related to treatment |
| B                    | Infiltrated lymph nodes, with no evidence of pathological response to treatment          |
| C                    | Infiltrated lymph nodes, with partial regression due to neoadjuvant therapy              |
| D                    | Complete pathological response in a previously infiltrated lymph node                    |

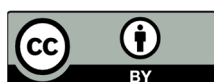

Supplement: s1 [file s1]
